# Supplementary material
Source: PubMed Central journal article supplement (PMC6716971)
Supplement: NIHMS1518989-supplement-1.pdf [file NIHMS1518989-supplement-1.pdf]

**Supplementary Table 1.** The Hinchey grading system for classification of diverticulitis

| Hinchey grade | Description                                                          |
|---------------|----------------------------------------------------------------------|
| I             | Presence of a phlegmon or area of inflammation adjacent to the colon |
| II            | Presence of a small contained pelvic abscess                         |
| III           | Presence of purulent peritonitis                                     |
| IV            | Presence of fecal peritonitis                                        |
